# Supplementary material for: Switchable tuning selectivity of CO2 hydrogenation via anion-modification of the Ru/TiO2 catalyst
Source: Royal Society of Chemistry journal article supplement (doi:10.1039/d3nj01516e), 2023-01-01
Supplement: d3nj01516e1.pdf [file d3nj01516e1.pdf]

## Supporting Information

### Switchable tuning selectivity of CO<sub>2</sub> hydrogenation via anions modification over Ru/TiO<sub>2</sub> catalyst

Jin Zhang, ‡<sup>ab</sup> Tianfen Huang, ‡<sup>ac</sup> Ruiyi Wang, <sup>\*a</sup> Xincheng Li, <sup>ad</sup> Jing Wang, <sup>ad</sup> Hui Ge, <sup>a</sup> Jun Ren, <sup>b</sup> Yunwei Wang <sup>\*a</sup> and Zhanfeng Zheng <sup>\*ad</sup>

<sup>a</sup> State Key Laboratory of Coal Conversion, Institute of Coal Chemistry, Chinese Academy of Sciences, Taiyuan 030001, China. E-mails: zfzheng@sxicc.ac.cn;

<sup>b</sup> Shanxi Institute of Science and Technology, Jincheng 048000, China

<sup>c</sup> School of Chemical Engineering and Technology, North University of China, Taiyuan 030051, China

<sup>d</sup> Center of Materials Science and Optoelectronics Engineering, University of Chinese Academy of Sciences, Beijing 100049, China

‡ Jin Zhang and Tianfen Huang contributed equally to this work

## Experimental

### Materials

TiO<sub>2</sub> (anatase, 99.8%, 10–20 nm), decalin (AR) and RuCl<sub>3</sub>·xH<sub>2</sub>O (Ru content 45%–55%) were purchased from Aladdin Chemical Reagent Network. NaOH (AR) was purchased from Tianjin Kermel Chemical Reagent Network. Na<sub>2</sub>CO<sub>3</sub> (AR) was purchased from Tianjin Tianli Chemical Reagent Network. Na<sub>2</sub>SO<sub>4</sub> (AR), NaNO<sub>3</sub> (AR) and NaCl (AR) were purchased from Sinopharm Chemical Reagent Network.

### Catalyst preparation

Firstly, 0.5 g of TiO<sub>2</sub> was added into a flask containing 100 mL ultrapure water. The flask was put in an oil bath and set at 50 °C. Then, 1.6 mL of RuCl<sub>3</sub> solution (0.03 mol L<sup>-1</sup>) and 0.003 mol of sodium salt containing different anions (NaOH, Na<sub>2</sub>CO<sub>3</sub>, Na<sub>2</sub>SO<sub>4</sub>, NaNO<sub>3</sub> and NaCl) were added to the flask and stirred continuously for 12 h. The mixture was further centrifuged and washed to neutrality with ultrapure water. Next, the collected solid was dried overnight in an oven at 60 °C. Finally, the sample was reduced in H<sub>2</sub> atmosphere at 300 °C for 2 h to obtain Ru/TiO<sub>2</sub> catalysts. Ru/TiO<sub>2</sub>-OH, Ru/TiO<sub>2</sub>-CO<sub>3</sub>, Ru/TiO<sub>2</sub>-Cl, Ru/TiO<sub>2</sub>-NO<sub>3</sub> and Ru/TiO<sub>2</sub>-SO<sub>4</sub> correspond to the catalysts modified by different anions with NaOH, Na<sub>2</sub>CO<sub>3</sub>, NaCl, NaNO<sub>3</sub> and Na<sub>2</sub>SO<sub>4</sub>. Ru/TiO<sub>2</sub> catalyst was prepared by the same procedure without anions modification.

### Characterization

X-ray diffraction (XRD) pattern was obtained by using Cu K $\alpha$  radiation on the miniflex II diffractometer. XPS spectrum was analyzed by thermal ESCALAB 250 spectrometer and the binding energy was calibrated according to the peak of C 1s (284.6 eV). Transmission electron microscope (TEM) and high resolution TEM (HRTEM) images were characterized by JEM-2010F instrument. The actual loading of Ru on the Ru/TiO<sub>2</sub> catalyst surface was detected by inductively coupled plasma optical emission spectrometry (ICP-OES) using a thermosensitive iCAP6300 spectrometer. The temperature programmed desorption of CO (CO-TPD) was performed by TP-5080 instrument. 100 mg of catalyst was pretreated in N<sub>2</sub> at 300 °C for 1 h, and then cooled to 50 °C before CO adsorption. After CO adsorption for 20 min, the catalyst was washed with N<sub>2</sub> at 50 °C for 30 min to remove the physically absorbed CO. Then the desorption mode was recorded from 50 to 500 °C with a heating rate of 10 °C min<sup>-1</sup>. The specific surface area of catalysts were

calculated by the Brunauer–Emmett–Teller (BET) method from the data in a  $P/P_0$  range between 0.05 and 0.2.

In situ diffuse reflectance infrared Fourier transform spectroscopy (in situ DRIFTS) spectra were recorded by the Bruker tensor II spectrometer equipped with liquid nitrogen cooling. The test was proceeded as follows: the catalyst was added into the in situ cell, and the reaction cell was heated to 200 °C and maintained for 2 h under the Ar flow ( $30 \text{ mL min}^{-1}$ ) to remove the moisture on the catalyst surface, and then the background spectrum was recorded. Next, the mixed gas of  $\text{CO}_2/\text{H}_2$  was introduced into the reaction cell, and the scanning spectrum were recorded. The spectrum of CO was obtained by introducing CO gas into the reaction cell with the same operation.

### **Catalytic performance evaluation**

The catalytic performance of the catalyst for  $\text{CO}_2$  hydrogenation was tested in a 100 mL stainless steel autoclave. Generally, 10 mL of decalin and 100 mg of catalyst were added into the autoclave, and purged with feed gas for 2 min. Next, the mixture of  $\text{CO}_2/\text{H}_2$  ( $\text{CO}_2/\text{H}_2=1:3$ ) was introduced into the autoclave, and set the pressure as 1.0 MPa. Then the autoclave was heated to 200 or 300 °C under magnetic stirring (500 rpm). Finally, the autoclave was put into a water bath for cooling. The reaction products were analyzed by Shimadzu GC-2014 gas chromatography. In the catalyst cyclic experiment, the catalyst was recovered by filtration and washed with ultrapure water, and then dried at 60 °C overnight.

**Table S1** Comparison between anion modification strategy used in this work and other strategy previously reported in selective hydrogenation of CO<sub>2</sub>.

| Entry                                                                             | Catalyst                | Conversion (%) <sup>a</sup> | Product         | Selectivity (%)            | Reference |
|-----------------------------------------------------------------------------------|-------------------------|-----------------------------|-----------------|----------------------------|-----------|
| /Reaction rate (mol <sub>CO2</sub> g <sup>-1</sup> h <sup>-1</sup> ) <sup>b</sup> |                         |                             |                 |                            |           |
| 1                                                                                 | Ru/TiO <sub>2</sub> .OH | 25.2 <sup>a</sup>           | CH <sub>4</sub> | 97.1                       | This work |
| 2                                                                                 | Cl-TiO <sub>2</sub>     | 6.6 <sup>b</sup>            | CH <sub>4</sub> | 56                         | [1]       |
| 3                                                                                 | NaOH-TiO <sub>2</sub>   | 0.052 <sup>b</sup>          | CH <sub>4</sub> | -                          | [2]       |
| 4                                                                                 | Ru/ZrO <sub>2</sub>     | 1.2 <sup>a</sup>            | CH <sub>4</sub> | 99                         | [3]       |
| 5                                                                                 | Rh/TiO <sub>2</sub>     | 0.15 <sup>b</sup>           | CO              | 99                         | [4]       |
| 6                                                                                 | Rh/TiO <sub>2</sub>     | 2.9 <sup>b</sup>            | CH <sub>4</sub> | 91.3                       | [5]       |
| 7                                                                                 | FeP                     | -                           | CO              | 92% (Faradaic efficiency)  | [6]       |
| 8                                                                                 | Ag electrode            | -                           | CO              | 45.4% (Current efficiency) | [7]       |

<sup>a</sup> The catalytic performance was evaluated in batch reactor.

<sup>b</sup> The catalytic performance was evaluated in fixed bed reactor.

**Table S2** Physical parameters of various catalysts. <sup>a</sup>

| Entry | Catalyst                             | Surface area<br>(m <sup>2</sup> g <sup>-1</sup> ) | Pore size<br>(nm) |
|-------|--------------------------------------|---------------------------------------------------|-------------------|
| 1     | Ru/TiO <sub>2</sub>                  | 67.50                                             | 19.13             |
| 2     | Ru/TiO <sub>2</sub> -CO <sub>3</sub> | 71.13                                             | 18.89             |
| 3     | Ru/TiO <sub>2</sub> -Cl              | 70.71                                             | 18.72             |
| 4     | Ru/TiO <sub>2</sub> -NO <sub>3</sub> | 72.90                                             | 18.79             |
| 5     | Ru/TiO <sub>2</sub> -OH              | 66.57                                             | 17.97             |
| 6     | Ru/TiO <sub>2</sub> -SO <sub>4</sub> | 73.18                                             | 18.41             |

<sup>a</sup> The specific surface area and pore size were measured by N<sub>2</sub> adsorption.

**Table S3** The loading amount of Ru of various Ru/TiO<sub>2</sub> catalysts. <sup>a</sup>

|                        | Ru/TiO <sub>2</sub> | Ru/TiO <sub>2</sub> -<br>CO <sub>3</sub> | Ru/TiO <sub>2</sub> -<br>Cl | Ru/TiO <sub>2</sub> -<br>NO <sub>3</sub> | Ru/TiO <sub>2</sub> -<br>SO <sub>4</sub> | Ru/TiO <sub>2</sub> -<br>OH |
|------------------------|---------------------|------------------------------------------|-----------------------------|------------------------------------------|------------------------------------------|-----------------------------|
| Ru<br>Content<br>(wt%) | 0.92                | 0.94                                     | 0.92                        | 0.95                                     | 0.89                                     | 0.91                        |

<sup>a</sup> Data were determined by ICP-OES.

**Table S4** Analysis of different anions content.

|                                                                                          | Ru-TiO <sub>2</sub> -OH | Ru-TiO <sub>2</sub> -CO <sub>3</sub> | Ru-TiO <sub>2</sub> -Cl | Ru-TiO <sub>2</sub> -NO <sub>3</sub> | Ru-TiO <sub>2</sub> -SO <sub>4</sub> |
|------------------------------------------------------------------------------------------|-------------------------|--------------------------------------|-------------------------|--------------------------------------|--------------------------------------|
| The total amount of Cl <sup>-</sup> added during catalyst preparation (mg)               | 4.93                    | 4.93                                 | 111.43                  | 4.93                                 | 4.93                                 |
| Cl <sup>-</sup> content in filtrate (mg)                                                 | 4.41                    | 4.14                                 | 102.7                   | 4.07                                 | 3.95                                 |
| Cl <sup>-</sup> content in catalysts (mg)                                                | 0.52                    | 0.79                                 | 9.73                    | 0.86                                 | 0.98                                 |
| The total amount of OH <sup>-</sup> added during catalyst preparation (mg)               | 51.7                    | -                                    | -                       | -                                    | -                                    |
| OH <sup>-</sup> content in filtrate (mg)                                                 | 42.8                    | -                                    | -                       | -                                    | -                                    |
| OH <sup>-</sup> content in catalysts (mg)                                                | 8.9                     | -                                    | -                       | -                                    | -                                    |
| The total amount of CO <sub>3</sub> <sup>2-</sup> added during catalyst preparation (mg) | -                       | 176.4                                | -                       | -                                    | -                                    |
| CO <sub>3</sub> <sup>2-</sup> content in filtrate (mg)                                   | -                       | 146.9                                | -                       | -                                    | -                                    |
| CO <sub>3</sub> <sup>2-</sup> content in catalysts (mg)                                  | -                       | 29.5                                 | -                       | -                                    | -                                    |
| The total amount of Cl <sup>-</sup> added during catalyst preparation (mg)               | -                       | -                                    | 111.43                  | -                                    | -                                    |
| Cl <sup>-</sup> content in filtrate (mg)                                                 | -                       | -                                    | 102.7                   | -                                    | -                                    |
| Cl <sup>-</sup> content in catalysts (mg)                                                | -                       | -                                    | 9.73                    | -                                    | -                                    |
| The total amount of NO <sub>3</sub> <sup>-</sup> added during catalyst preparation (mg)  | -                       | -                                    | -                       | 184.4                                | -                                    |
| NO <sub>3</sub> <sup>-</sup> content in filtrate (mg)                                    | -                       | -                                    | -                       | 174.6                                | -                                    |
| NO <sub>3</sub> <sup>-</sup> content in catalysts (mg)                                   | -                       | -                                    | -                       | 9.8                                  | -                                    |
| The total amount of SO <sub>4</sub> <sup>2-</sup> added during catalyst preparation (mg) | -                       | -                                    | -                       | -                                    | 286.2                                |
| SO <sub>4</sub> <sup>2-</sup> content in filtrate (mg)                                   | -                       | -                                    | -                       | -                                    | 267.3                                |
| SO <sub>4</sub> <sup>2-</sup> content in catalysts (mg)                                  | -                       | -                                    | -                       | -                                    | 18.9                                 |

**Table S5** The average particle size of Ru nanoparticles of various Ru/TiO<sub>2</sub> catalysts.

|                                | Ru/TiO <sub>2</sub> | Ru/TiO <sub>2</sub> -SO <sub>4</sub> | Ru/TiO <sub>2</sub> -NO <sub>3</sub> | Ru/TiO <sub>2</sub> -OH | Ru/TiO <sub>2</sub> -Cl | Ru/TiO <sub>2</sub> -CO <sub>3</sub> |
|--------------------------------|---------------------|--------------------------------------|--------------------------------------|-------------------------|-------------------------|--------------------------------------|
| Particle<br>size of<br>Ru (nm) | 1.50                | 1.52                                 | 1.68                                 | 1.62                    | 1.36                    | 1.43                                 |

**Table S6** The effect of OH<sup>-</sup> concentration on the catalytic performance of CO<sub>2</sub> over Ru/TiO<sub>2</sub>-OH catalysts.

| Entry | Molar amount of NaOH<br>added (mol) | Catalysts                   | CO <sub>2</sub> conversion | CH <sub>4</sub> selectivity |
|-------|-------------------------------------|-----------------------------|----------------------------|-----------------------------|
| 1     | 0.0000                              | Ru/TiO <sub>2</sub>         | 11.3                       | 4.6                         |
| 2     | 0.0005                              | Ru/TiO <sub>2</sub> -OH-0.5 | 12.1                       | 5.9                         |
| 3     | 0.0010                              | Ru/TiO <sub>2</sub> -OH-1   | 19.4                       | 54.2                        |
| 4     | 0.0020                              | Ru/TiO <sub>2</sub> -OH-2   | 23.7                       | 86.5                        |
| 5     | 0.0030                              | Ru/TiO <sub>2</sub> -OH-3   | 25.2                       | 97.1                        |

Ru/TiO<sub>2</sub>-OH-3 catalyst represents Ru/TiO<sub>2</sub>-OH catalyst in the manuscript.

**Table S7** The effect of  $\text{NO}_3^-$  concentration on the catalytic performance of  $\text{CO}_2$  over Ru/TiO<sub>2</sub>-  
 $\text{NO}_3$  catalysts.

| Entry | Molar amount of $\text{NaNO}_3$<br>added (mol) | Catalysts                                | $\text{CO}_2$ conversion | CO selectivity |
|-------|------------------------------------------------|------------------------------------------|--------------------------|----------------|
| 1     | 0.0000                                         | Ru/TiO <sub>2</sub>                      | 11.3                     | 95.4           |
| 2     | 0.0005                                         | Ru/TiO <sub>2</sub> - $\text{NO}_3$ -0.5 | 10.4                     | 94.7           |
| 3     | 0.0010                                         | Ru/TiO <sub>2</sub> - $\text{NO}_3$ -1   | 9.2                      | 93.2           |
| 4     | 0.0020                                         | Ru/TiO <sub>2</sub> - $\text{NO}_3$ -2   | 8.6                      | 91.7           |
| 5     | 0.0030                                         | Ru/TiO <sub>2</sub> - $\text{NO}_3$ -3   | 8.2                      | 91.1           |

Ru/TiO<sub>2</sub>- $\text{NO}_3$ -3 catalyst represents Ru/TiO<sub>2</sub>- $\text{NO}_3$  catalyst in the manuscript.

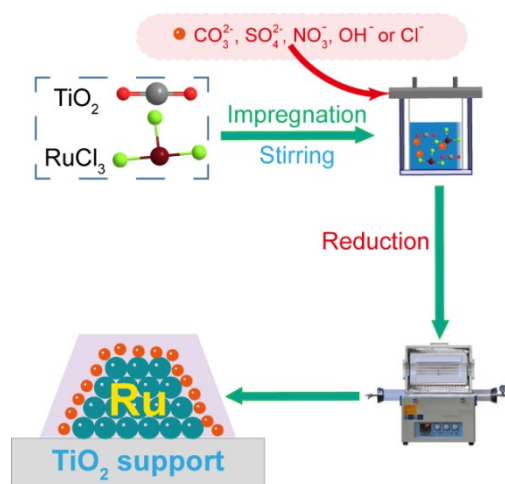

**Fig. S1** Preparation process of Ru/TiO<sub>2</sub> catalysts modified by different anions.

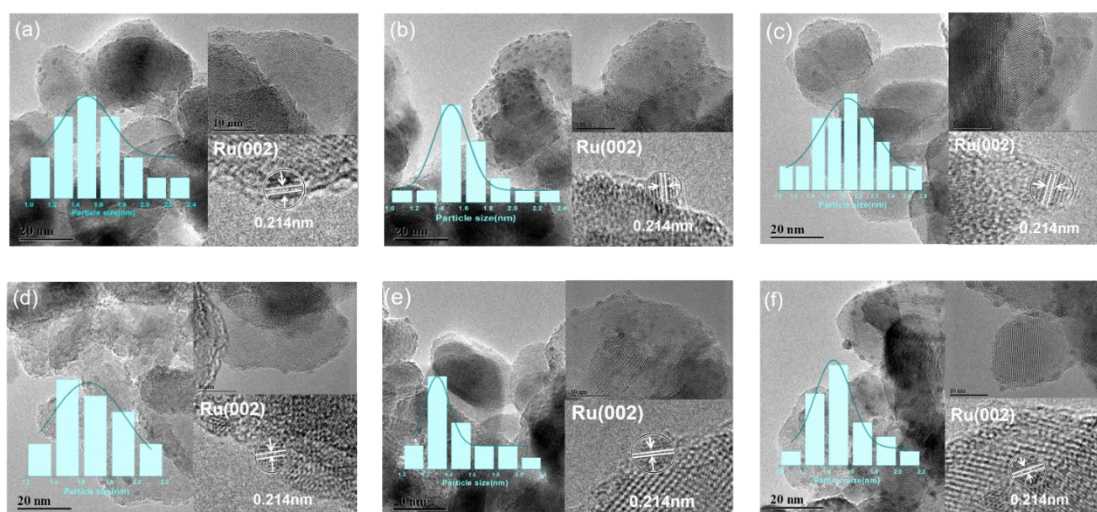

**Fig. S2** TEM images of (a) Ru/TiO<sub>2</sub>, (b) Ru/TiO<sub>2</sub>-SO<sub>4</sub>, (c) Ru/TiO<sub>2</sub>-NO<sub>3</sub>, (d) Ru/TiO<sub>2</sub>-OH, (e) Ru/TiO<sub>2</sub>-Cl and (f) Ru/TiO<sub>2</sub>-CO<sub>3</sub> catalysts.

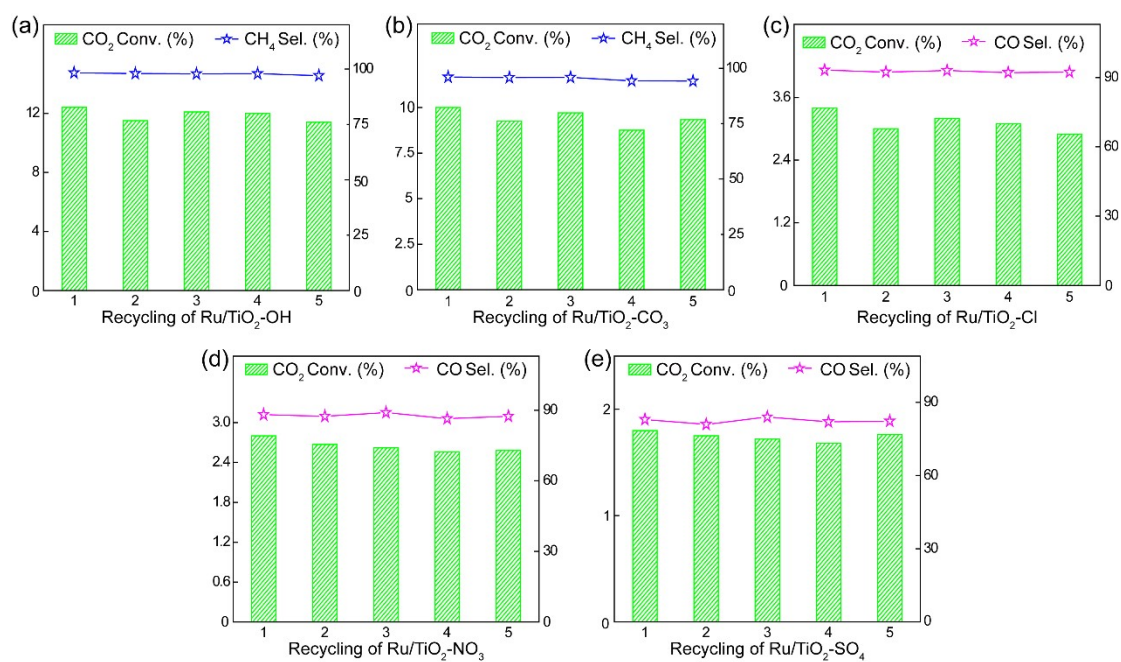

**Fig. S3** Recycling test of (a) Ru/TiO<sub>2</sub>-OH, (b) Ru/TiO<sub>2</sub>-CO<sub>3</sub>, (c) Ru/TiO<sub>2</sub>-Cl, (d) Ru/TiO<sub>2</sub>-NO<sub>3</sub> and (e) Ru/TiO<sub>2</sub>-SO<sub>4</sub> catalysts.

Reaction conditions: 100 mg of catalysts, 10 mL decalin, CO<sub>2</sub>/H<sub>2</sub> (CO<sub>2</sub>/H<sub>2</sub>=1:3, 1MPa), 4 h, 200 °C.

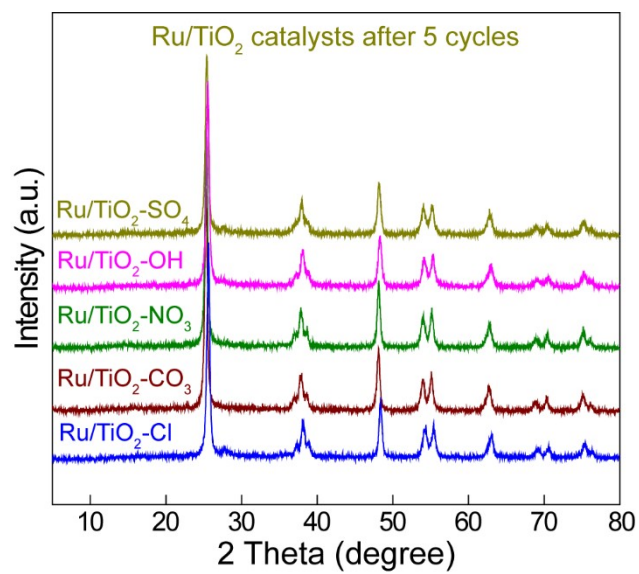

**Fig. S4** XRD patterns of recycled Ru/TiO<sub>2</sub>-OH, Ru/TiO<sub>2</sub>-CO<sub>3</sub>, Ru/TiO<sub>2</sub>-Cl, Ru/TiO<sub>2</sub>-NO<sub>3</sub> and Ru/TiO<sub>2</sub>-SO<sub>4</sub> catalysts.

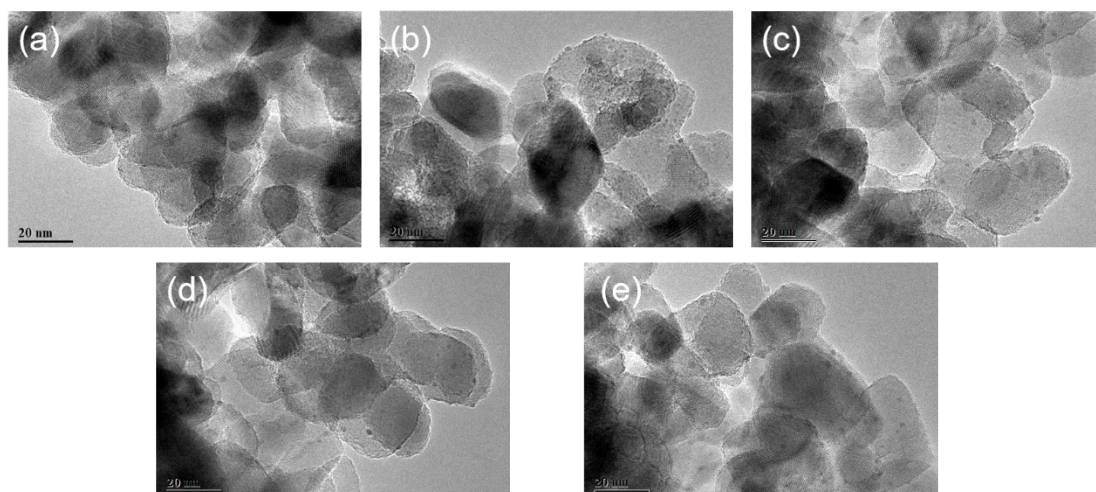

**Fig. S5** TEM images of recycled (a) Ru/TiO<sub>2</sub>-SO<sub>4</sub>, (b) Ru/TiO<sub>2</sub>-NO<sub>3</sub>, (c) Ru/TiO<sub>2</sub>-OH, (d) Ru/TiO<sub>2</sub>-Cl and (e) Ru/TiO<sub>2</sub>-CO<sub>3</sub> catalysts.

## References

- [1] J. Wu, H. Lu, X. Zhang, F. Raziq, Y. Qu and L. Jing, *Chem. Commun.*, 2016, **52**, 5027-5029.
- [2] X. Meng, S. Ouyang, T. Kako, P. Li, Q. Yu, T. Wang and J. Ye, *Chem. Commun.*, 2014, **50**, 11517-11519.
- [3] M. Gao, J. Zhang, P. Zhu, X. Liu and Z. Zheng, *Appl. Catal. B: Environm.*, 2022, **314**, 121476.
- [4] Y. Zhang, Z. Zhang, X. Yang, R. Wang, H. Duan, Z. Shen, L. Li, Y. Su, R. Yang, Y. Zhang, X. Su, Y. Huang and T. Zhang, *Green Chem.*, 2020, **22**, 6855-6861.
- [5] F. Cao, N. Gong, Z. Ma, X. Wang, M. Tan, Y. Wu and Y. Tan, *Chem. Commun.*, 2022, **58**, 4219-4222.
- [6] K. Guo, H. Lei, X. Li, Z. Zhang, Y. Wang, H. Guo, W. Zhang and R. Cao, *Chin. J. Catal.*, 2021, **58**, 1439–1444.
- [7] Y. Hsieh, L. Betancourt, S. Senanayake, E. Hu, Y. Zhang, W. Xu and D. Polyansky, *ACS Appl. Energy Mater.*, 2019, **2**, 102-109.
